# Supplementary material for: Activity budget and gut microbiota stability and flexibility across reproductive states in wild capuchin monkeys in a seasonal tropical dry forest
Source: PubMed Central journal article supplement (PMC10724892; doi:10.1186/s42523-023-00280-6), 2023-12-15
Supplement: 42523_2023_280_MOESM1_ESM.pdf [file 42523_2023_280_MOESM1_ESM.pdf]

**Supplemental Table 1.** Ethogram of behaviors for white-faced capuchin monkeys at Sector Santa Rosa, Costa Rica

| Type of Behavior   | Specific Behavior           | Code | Description                                                          |
|--------------------|-----------------------------|------|----------------------------------------------------------------------|
| Foraging           | Forage: Insect (Extractive) | EFI  | Tearing branches, ripping bark                                       |
|                    | Forage: Fruit (Extractive)  | EFF  | Pounding, scrubbing, or breaking open fruits                         |
|                    | Forage: Flower              | FFL  | Feeding on flowers                                                   |
|                    | Forage: Fruit               | FFR  | Feeding on fruit                                                     |
|                    | Forage: Insect              | FIN  | Feeding on insects                                                   |
|                    | Forage: Other               | FOT  | Bromeliad leaves, pith, vertebrates                                  |
|                    | Forage: Visually            | VFO  | Actively looking for food, including gleaning insects while moving   |
|                    | Forage: Out of sight        | FOS  | Monkey is foraging but mouth and/or forelimbs are not visible        |
| Resting            | Rest (Solitary)             | RES  | Lying alone, not moving                                              |
|                    | Rest (Social)               | SRE  | Not moving, lying down                                               |
| Travel             | Travel                      | TRA  | Travel; moving very rapidly, not pausing for foraging or socializing |
| Social Affiliation | Social (Active)             | SAC  | Monkeys are affiliative; allogrooming                                |
| Social Aggression  | Social (Aggressive)         | SAG  | Chasing, biting conspecifics                                         |
| Other              | Vigilant                    | VIG  | Scanning intently at a long range (not for food)                     |
|                    | Drink                       | DRI  | Drink                                                                |
|                    | Excretion                   | EXC  | Excretion of feces, urine, or vomit                                  |
|                    | Self-Directed               | SDI  | Auto groom                                                           |
|                    | Play                        | PLA  | Play: biting, chasing, hitting, bouncing, pushing, pulling, etc.     |
|                    | Other                       | OTH  | Inter-group encounter, mobbing predator, sexual behaviour            |
